# Supplementary material
Source: PubMed Central journal article supplement (PMC5627210)

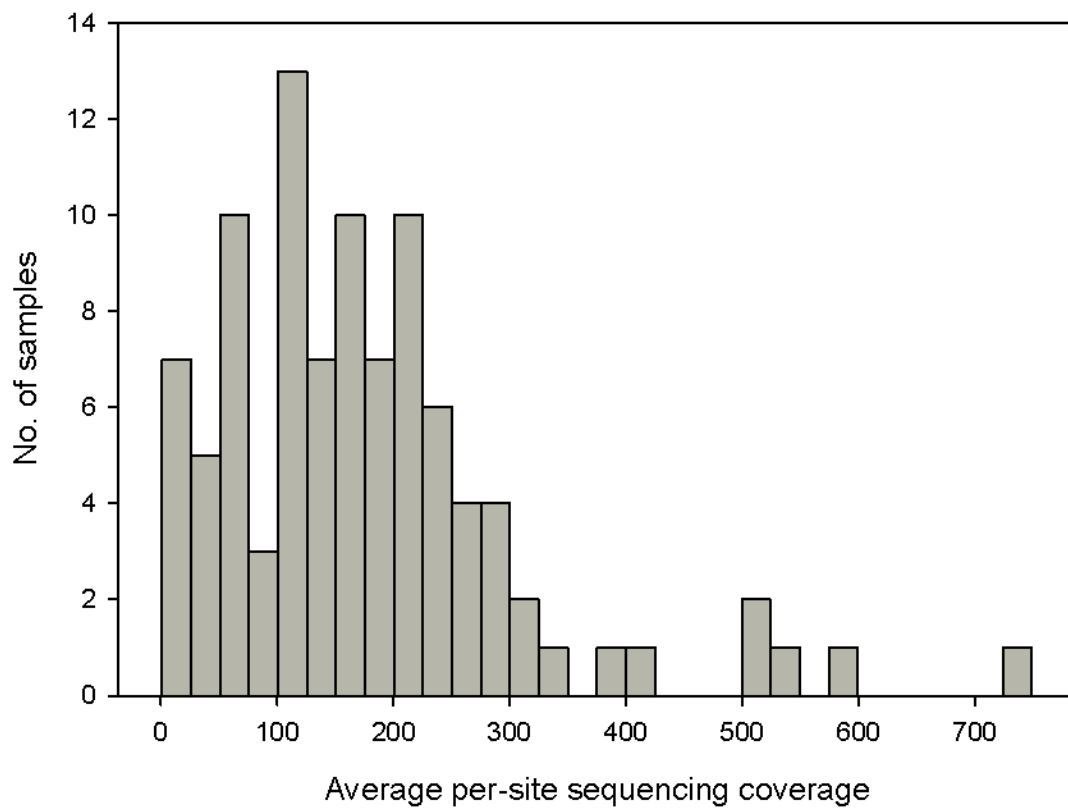

Supplement: rspb20171548supp1.pdf [file rspb20171548supp1.pdf]
